# Supplementary material
Source: Elsevier journal article supplement (https://www.sciencedirect.com/science/article/pii/S2530064422000529)
Supplement: mmc1 [file S2530064422000529:mmc1.docx]

| **Table.A.1** Number of sampled sites with their respective geographic coordinates and representative municipalities. | | | |
| --- | --- | --- | --- |
| **Locations** | **Longitude** | **Latitude** | **Municipalities** |
| 1 | 58°14'48W | 11°57'01S | Brasnorte |
| 2 | 58°12'54W | 11°57'12S | Brasnorte |
| 3 | 58°12'28W | 11°59'35S | Brasnorte |
| 4 | 58°18'08W | 11°58'00S | Brasnorte |
| 5 | 58°28'28W | 13°24'26S | Sapezal |
| 6 | 58°26'23W | 13°23'33S | Sapezal |
| 7 | 58°27'56W | 13°28'05S | Sapezal |
| 8 | 58°36'09W | 13°27'32S | Sapezal |
| 9 | 58°30'33W | 13°42'17S | Sapezal |
| 10 | 58°28'10W | 13°39'45S | Sapezal |
| 11 | 57°05'11W | 13°20'21S | Nova Maringá |
| 12 | 57°03'13W | 13°18'22S | Nova Maringá |
| 13 | 57°01'47W | 13°16'09S | Nova Maringá |
| 14 | 57°04'45W | 13°15'02S | Nova Maringá |
| 15 | 57°04'42W | 13°08'40S | Nova Maringá |
| 16 | 57°01'45W | 13°08'21S | Nova Maringá |
| 17 | 57°17'33W | 14°30'05S | Santo Afonso |
| 18 | 57°23'47W | 14°39'58S | Tangará da Serra |
| 19 | 57°43'26W | 14°19'55S | Tangará da Serra |
| 20 | 57°45'13W | 14°18'52S | Tangará da Serra |
| 21 | 57°32'40W | 14°14'29S | Nova Marilândia |
| 22 | 57°37'57W | 14°03'09S | Diamantino |
| 23 | 57°35'50W | 14°04'22S | Diamantino |
| 24 | 57°33'41W | 13°59'58S | Diamantino |
| 25 | 57°36'20W | 14°00'34S | Diamantino |
| 26 | 58°03'45W | 13°25'17S | Campo Novo do Parecis |
| 27 | 58°07'02W | 13°17'45S | Campo Novo do Parecis |
| 28 | 58°04'19W | 13°15'39S | Campo Novo do Parecis |
| 29 | 58°06'35W | 13°15'22S | Campo Novo do Parecis |
| 30 | 57°55'12W | 13°19'09S | Campo Novo do Parecis |
| 31 | 57°58'47W | 13°19'22S | Campo Novo do Parecis |
| 32 | 57°58'12W | 14°13'19S | Campo Novo do Parecis |
| 33 | 57°55'55W | 14°07'38S | Campo Novo do Parecis |
| 34 | 57°53'19W | 14°11'05S | Campo Novo do Parecis |
| 35 | 57°57'36W | 14°22'35S | Tangará da Serra |
| 36 | 57°52'55W | 13°02'38S | Brasnorte |
| 37 | 57°50'13W | 13°02'46S | Brasnorte |
| 38 | 58°06'27W | 12°27'30S | Brasnorte |
| 39 | 58°09'48W | 12°25'09S | Brasnorte |
| 40 | 57°25'10W | 14°37'15S | Tangará da Serra |
| 41 | 58°09'40W | 12°25'32S | Brasnorte |
| 42 | 57°25’66W | 14°37’19S | Tangará da Serra |
