# Supplementary material
Source: Elsevier journal article supplement (https://www.sciencedirect.com/science/article/pii/S2530064422000529)
Supplement: mmc2 [file S2530064422000529:mmc2.docx]

| **Table.S2** Species of ants registered within soybean plantations and native habitat (Legal Reserve) in their respective landscape types: Cerrado savannah, transitional vegetation, and Amazon forest. | | | | | | | | | | | | | | | | | | | | | | | |
| --- | --- | --- | --- | --- | --- | --- | --- | --- | --- | --- | --- | --- | --- | --- | --- | --- | --- | --- | --- | --- | --- | --- | --- |
| **Species** | **Cerrado savannah** | | | | | | | **Transional vegetation** | | | | | **Amazon forest** | | | | | | |  | | | |
|  | Soybean plantations | Legal Reserve | | | |  | | Soybean plantations | | Legal Reserve |  | | | | Soybean plantations | Legal Reserve | | |  | | **Grand total** | | |
| **Subfamily Amblyoponinae** |  | |  | | |  | |  | |  |  | |  | | |  | | |  | |  | | |
| *Prionopelta* sp.1 |  | |  | | |  | |  | | 1 |  | |  | | |  | | |  | | 1 | | |
| **Subfamily Dolichoderinae** |  | |  | | |  | |  | |  |  | |  | | |  | | |  | |  | | |
| *Azteca* sp.1 |  | |  | | |  | |  | | 1 |  | |  | | | 4 | | |  | | 5 | | |
| *Azteca* sp.2 |  | |  | | |  | |  | |  |  | |  | | | 1 | | |  | | 1 | | |
| *Dolichoderus* aff *rugosus* (Smith, F., 1858) |  | | 1 | | |  | |  | | 3 |  | | 2 | | | 17 | | |  | | 23 | | |
| *Dolichoderus attelaboides* (Fabricius, 1775) |  | |  | | |  | |  | | 1 |  | |  | | | 6 | | |  | | 7 | | |
| *Dolichoderus decollatus* (Smith, F., 1858) |  | |  | | |  | |  | |  |  | |  | | | 3 | | |  | | 3 | | |
| *Dolichoderus ghilianii* (Emery, 1894) |  | |  | | |  | |  | | 1 |  | |  | | |  | | |  | | 1 | | |
| *Dolichoderus imitator* (Emery, 1894) |  | | 1 | | |  | |  | |  |  | |  | | | 58 | | |  | | 59 | | |
| *Dolichoderus* sp.3 |  | |  | | |  | |  | |  |  | |  | | | 1 | | |  | | 1 | | |
| *Dorymyrmex brunneus* (Forel, 1908) | 5 | | 12 | | |  | | 6 | | 8 |  | | 32 | | | 5 | | |  | | 68 | | |
| *Dorymyrmex goeldii* (Forel, 1904) | 3 | |  | | |  | | 1 | |  |  | | 13 | | |  | | |  | | 17 | | |
| *Dorymyrmex pyramycus* (Roger, 1863) | 3 | | 28 | | |  | | 3 | | 9 |  | | 3 | | | 3 | | |  | | 49 | | |
| *Dorymyrmex* sp.1 |  | | 2 | | |  | | 4 | |  |  | | 2 | | |  | | |  | | 8 | | |
| *Linepithema* sp.1 |  | | 38 | | |  | |  | | 13 |  | | 7 | | | 11 | | |  | | 69 | | |
| *Linepithema* sp.2 |  | | 1 | | |  | |  | |  |  | | 1 | | |  | | |  | | 2 | | |
| *Tapinoma* sp.1 |  | |  | | |  | |  | | 1 |  | |  | | | 1 | | |  | | 2 | | |
| **Subfamily Dorylinae** |  | |  | | |  | |  | |  |  | |  | | |  | | |  | |  | | |
| *Labidus* sp.1 |  | |  | | |  | |  | |  |  | |  | | | 4 | | |  | | 4 | | |
| **Subfamily Ectatomminae** |  | |  | | |  | |  | |  |  | |  | | |  | | |  | |  | | |
| *Ectatomma brunneum* (Smith, F., 1858) |  | |  | | |  | | 1 | |  |  | | 7 | | | 3 | | |  | | 11 | | |
| *Ectatomma edentatum* (Roger, 1863) |  | | 19 | | |  | |  | | 3 |  | |  | | | 36 | | |  | | 58 | | |
| *Ectatomma lugens* (Emery, 1894) |  | | 4 | | |  | |  | | 1 |  | |  | | | 6 | | |  | | 11 | | |
| *Ectatomma permagnum* (Forel, 1908) |  | | 2 | | |  | |  | | 1 |  | |  | | | 8 | | |  | | 11 | | |
| *Ectatomma tuberculatum* (Olivier, 1792) |  | | 24 | | |  | |  | | 18 |  | |  | | | 16 | | |  | | 58 | | |
| *Gnamptogenys haenschi* (Emery, 1902) |  | |  | | |  | |  | |  |  | |  | | | 2 | | |  | | 2 | | |
| *Gnamptogenys* sp.1 |  | |  | | |  | |  | |  |  | | 2 | | |  | | |  | | 2 | | |
| *Gnamptogenys* sp.2 |  | | 4 | | |  | |  | | 3 |  | | 4 | | | 4 | | |  | | 15 | | |
| *Gnamptogenys* sp.3 |  | | 14 | | |  | |  | | 6 |  | | 1 | | | 16 | | |  | | 37 | | |
| *Gnamptogenys* sp.4 |  | | 5 | | |  | |  | | 2 |  | |  | | | 11 | | |  | | 18 | | |
| *Holcoponera moelleri* Forel, 1912 |  | | 4 | | |  | |  | | 3 |  | |  | | | 19 | | |  | | 26 | | |
| **Subfamily Formicinae** |  | |  | | |  | |  | |  |  | |  | | |  | | |  | |  | | |
| *Acropyga* sp.1 |  | |  | | |  | |  | | 2 |  | |  | | |  | | |  | | 2 | | |
| *Brachymyrmex* sp.1 | 7 | | 18 | | |  | | 1 | | 12 |  | | 17 | | | 9 | | |  | | 64 | | |
| *Brachymyrmex* sp.2 |  | | 3 | | |  | |  | | 2 |  | |  | | | 12 | | |  | | 17 | | |
| *Camponotus* aff *atriceps* (Smith, F., 1858) | 1 | | 5 | | |  | |  | | 9 |  | |  | | | 59 | | |  | | 74 | | |
| *Camponotus* aff *cacicus (*Emery, 1903) |  | |  | | |  | |  | |  |  | | 1 | | | 1 | | |  | | 2 | | |
| *Camponotus* aff *textor (*Forel, 1899) |  | |  | | |  | |  | |  |  | | 1 | | |  | | |  | | 1 | | |
| *Camponotus burtoni* (Mann, 1916) |  | | 1 | | |  | |  | |  |  | |  | | |  | | |  | | 1 | | |
| *Camponotus femoratus* (Fabricius, 1804) |  | | 1 | | |  | |  | |  |  | |  | | | 6 | | |  | | 7 | | |
| *Camponotus* sp.1 |  | | 45 | | |  | |  | | 54 |  | | 4 | | | 95 | | |  | | 198 | | |
| *Camponotus* sp.2 |  | | 37 | | |  | | 1 | | 38 |  | | 1 | | | 15 | | |  | | 92 | | |
| *Camponotus* sp.3 |  | |  | | |  | |  | | 1 |  | | 1 | | | 3 | | |  | | 5 | | |
| *Camponotus* sp.4 |  | | 7 | | |  | |  | | 4 |  | |  | | | 2 | | |  | | 13 | | |
| *Camponotus* sp.5 |  | | 4 | | |  | |  | | 6 |  | |  | | | 12 | | |  | | 22 | | |
| *Camponotus* sp.6 |  | | 8 | | |  | |  | | 18 |  | |  | | | 34 | | |  | | 60 | | |
| *Camponotus* sp.7 |  | |  | | |  | |  | | 1 |  | |  | | | 3 | | |  | | 4 | | |
| *Camponotus* sp.8 |  | | 23 | | |  | |  | | 3 |  | |  | | | 29 | | |  | | 55 | | |
| *Camponotus* sp.9 |  | |  | | |  | |  | | 1 |  | |  | | |  | | |  | | 1 | | |
| *Camponotus* sp.11 |  | | 4 | | |  | |  | | 1 |  | |  | | | 9 | | |  | | 14 | | |
| *Camponotus* sp.12 |  | | 6 | | |  | |  | | 2 |  | |  | | | 1 | | |  | | 9 | | |
| *Camponotus* sp.13 |  | | 1 | | |  | |  | | 1 |  | |  | | | 8 | | |  | | 10 | | |
| *Camponotus* sp.14 |  | |  | | |  | |  | |  |  | |  | | | 1 | | |  | | 1 | | |
| *Camponotus* sp.15 |  | |  | | |  | |  | |  |  | |  | | | 5 | | |  | | 5 | | |
| *Camponotus* sp.16 |  | | 2 | | |  | |  | |  |  | |  | | |  | | |  | | 2 | | |
| *Camponotus* sp.17 |  | |  | | |  | |  | |  |  | |  | | | 1 | | |  | | 1 | | |
| *Camponotus* sp.21 |  | |  | | |  | |  | |  |  | |  | | | 4 | | |  | | 4 | | |
| *Camponotus* sp.23 |  | | 1 | | |  | |  | |  |  | |  | | |  | | |  | | 1 | | |
| *Gigantiops destructor* (Fabricius, 1804) |  | | 11 | | |  | | 1 | | 36 |  | |  | | | 67 | | |  | | 115 | | |
| *Nylanderia* sp.1 |  | | 2 | | |  | |  | | 25 |  | | 31 | | | 52 | | |  | | 110 | | |
| **Subfamily Myrmicinae** |  | |  | | |  | |  | |  |  | |  | | |  | | |  | |  | | |
| *Acromyrmex* sp.1 |  | | 18 | | |  | |  | | 14 |  | |  | | | 14 | | |  | | 46 | | |
| *Acromyrmex* sp.2 |  | | 29 | | |  | |  | | 2 |  | |  | | | 28 | | |  | | 59 | | |
| *Acromyrmex* sp.3 |  | |  | | |  | |  | |  |  | |  | | | 4 | | |  | | 4 | | |
| *Acromyrmex* sp.4 |  | |  | | |  | |  | |  |  | |  | | | 2 | | |  | | 2 | | |
| *Acromyrmex* sp.5 |  | |  | | |  | |  | |  |  | |  | | | 1 | | |  | | 1 | | |
| *Apterostigma megacephala* (Lattke, 1999) |  | |  | | |  | |  | | 5 |  | |  | | | 15 | | |  | | 20 | | |
| *Apterostigma* sp.1 |  | |  | | |  | |  | | 2 |  | |  | | | 5 | | |  | | 7 | | |
| *Apterostigma* sp.2 |  | |  | | |  | |  | |  |  | |  | | | 1 | | |  | | 1 | | |
| *Apterostigma* sp.3 |  | |  | | |  | |  | |  |  | |  | | | 1 | | |  | | 1 | | |
| *Atta* sp.1 |  | | 6 | | |  | | 4 | | 4 |  | | 5 | | |  | | |  | | 19 | | |
| *Atta* sp.2 |  | | 55 | | |  | | 2 | | 8 |  | | 3 | | | 63 | | |  | | 131 | | |
| *Atta* sp.3 |  | |  | | |  | |  | | 1 |  | | 1 | | | 6 | | |  | | 8 | | |
| *Atta* sp.4 |  | | 3 | | |  | |  | |  |  | | 1 | | | 2 | | |  | | 6 | | |
| *Basiceros militaris* (Weber, 1950) |  | |  | | |  | |  | |  |  | |  | | | 1 | | |  | | 1 | | |
| *Cephalotes atratus* (Linnaeus, 1758) |  | |  | | |  | |  | | 1 |  | |  | | | 6 | | |  | | 7 | | |
| *Crematogaster abstinens* (Santschi, 1933) |  | | | | 1 | |  | |  |  | |  | |  | | | 1 | | | | |  | 2 | | |
| *Crematogaster acuta* (Fabricius, 1804) |  | | | | 4 | |  | |  | 1 | |  | |  | | |  | | | | |  | 5 | | |
| *Crematogaster brasiliensis* (Mayr, 1878) |  | | | |  | |  | |  | 4 | |  | | 1 | | | 6 | | | | |  | 11 | | |
| *Crematogaster carinata (*Mayr, 1862) |  | | | | 5 | |  | |  | 11 | |  | | 1 | | | 36 | | | | |  | 53 | | |
| *Crematogaster evallans (*Forel, 1907) |  | | | | 1 | |  | |  |  | |  | |  | | |  | | | | |  | 1 | | |
| *Crematogaster flavosensitiva* (Longino, 2003) |  | | | | 4 | |  | |  |  | |  | |  | | |  | | | | |  | 4 | | |
| *Crematogaster levior (*Longino, 2003) |  | | | |  | |  | |  |  | |  | | 1 | | |  | | | | |  | 1 | | |
| *Crematogaster limata* (Smith, F., 1858) |  | | | |  | |  | |  |  | |  | | 5 | | | 10 | | | | |  | 15 | | |
| *Crematogaster longispina* (Emery, 1890) |  | | | |  | |  | |  | 1 | |  | |  | | | 2 | | | | |  | 3 | | |
| *Crematogaster nigropilosa (*Mayr, 1870) |  | | | |  | |  | |  |  | |  | |  | | | 3 | | | | |  | 3 | | |
| *Crematogaster stollii* (Forel, 1885) |  | | | |  | |  | |  |  | |  | | 1 | | |  | | | | |  | 1 | | |
| *Crematogaster tenuicula* (Forel, 1904) | 1 | | | | 1 | |  | | 1 | 23 | |  | |  | | | 24 | | | | |  | 50 | | |
| *Cyphomyrmex* sp.1 |  | | 2 | | |  | |  | |  |  | |  | | | 4 | | |  | | 6 | | |
| *Cyphomyrmex* sp.2 |  | |  | | |  | |  | | 2 |  | |  | | | 1 | | |  | | 3 | | |
| *Cyphomyrmex* sp.3 |  | |  | | |  | |  | | 1 |  | |  | | | 2 | | |  | | 3 | | |
| *Cyphomyrmex* sp.4 |  | |  | | |  | |  | |  |  | |  | | | 1 | | |  | | 1 | | |
| *Cyphomyrmex* sp.5 |  | | 1 | | |  | |  | |  |  | |  | | |  | | |  | | 1 | | |
| *Cyphomyrmex* sp.6 |  | |  | | |  | |  | |  |  | |  | | | 1 | | |  | | 1 | | |
| *Cyphomyrmex* sp.7 |  | |  | | |  | |  | |  |  | |  | | | 1 | | |  | | 1 | | |
| *Cyphomyrmex* sp.8 |  | |  | | |  | |  | |  |  | |  | | | 1 | | |  | | 1 | | |
| *Cyphomyrmex* sp.9 |  | |  | | |  | |  | |  |  | |  | | | 1 | | |  | | 1 | | |
| *Daceton armigerum* (Latreille, 1802) |  | |  | | |  | |  | |  |  | |  | | | 1 | | |  | | 1 | | |
| *Mycocepurus smithii* (Forel, 1893) |  | | 2 | | |  | |  | |  |  | |  | | | 1 | | |  | | 3 | | |
| *Myrmicocrypta* sp.1 |  | |  | | |  | |  | |  |  | |  | | | 1 | | |  | | 1 | | |
| *Myrmicocrypta* sp.2 |  | |  | | |  | |  | |  |  | |  | | | 1 | | |  | | 1 | | |
| *Myrmicocrypta* sp.3 |  | |  | | |  | |  | |  |  | |  | | | 1 | | |  | | 1 | | |
| *Ochetomyrmex neopolitus* (Fernández, 2003) |  | | 1 | | |  | |  | | 1 |  | |  | | | 4 | | |  | | 6 | | |
| *Ochetomyrmex semipolitus* (Mayr, 1878) |  | |  | | |  | |  | |  |  | |  | | | 1 | | |  | | 1 | | |
| *Paratrachymyrmex* sp.1 |  | | 3 | | |  | |  | | 3 |  | |  | | | 22 | | |  | | 28 | | |
| *Paratrachymyrmex* sp.2 |  | | 2 | | |  | |  | | 3 |  | |  | | | 41 | | |  | | 46 | | |
| *Paratrachymyrmex* sp.3 |  | |  | | |  | |  | |  |  | |  | | | 1 | | |  | | 1 | | |
| *Pheidole* aff *biconstricta* (Mayr, 1870) |  | | 1 | | |  | |  | |  |  | |  | | | 1 | | |  | | 2 | | |
| *Pheidole* aff *bilimeki* (Mayr, 1870) |  | | 1 | | |  | | 1 | | 1 |  | | 2 | | | 8 | | |  | | 13 | | |
| *Pheidole* aff *fimbriata* (Roger, 1863) |  | |  | | |  | |  | |  |  | |  | | | 1 | | |  | | 1 | | |
| *Pheidole* aff *radoszkowskii* (Mayr, 1884) | 9 | | 26 | | |  | | 2 | | 27 |  | | 34 | | | 61 | | |  | | 159 | | |
| *Pheidole* aff *transversostriata (*Mayr, 1887) | 1 | | | | |  | | 3 | | 3 |  | | 4 | | | 8 | | |  | | 19 | | | |
| *Pheidole bufo* (Wilson, 2003) |  | | | | 1 | |  | |  | 15 | |  | |  | | | 9 | | | | |  | 25 | | |
| *Pheidole gertrudae* (Forel, 1886) |  | | | | 8 | |  | | 1 | 6 | |  | | 5 | | | 8 | | | | |  | 28 | | |
| *Pheidole nitella* (Wilson, 2003) |  | | | |  | |  | |  |  | |  | | 8 | | | 2 | | | | |  | 10 | | |
| *Pheidole* sp.1 | 3 | | | | 13 | |  | | 1 | 8 | |  | | 6 | | | 36 | | | | |  | 67 | | |
| *Pheidole* sp.2 |  | | | |  | |  | |  | 1 | |  | |  | | |  | | | | |  | 1 | | |
| *Pheidole* sp.3 | 28 | | | | 1 | |  | | 25 |  | |  | | 19 | | | 4 | | | | |  | 77 | | |
| *Pheidole* sp.4 | 2 | | | |  | |  | | 2 |  | |  | | 4 | | |  | | | | |  | 8 | | |
| *Pheidole* sp.5 | 1 | | | |  | |  | |  | 3 | |  | | 1 | | | 7 | | | | |  | 12 | | |
| *Pheidole* sp.6 |  | | | | 3 | |  | |  | 4 | |  | | 5 | | | 23 | | | | |  | 35 | | |
| *Pheidole* sp.7 |  | | | | 1 | |  | |  | 2 | |  | |  | | | 8 | | | | |  | 11 | | |
| *Pheidole* sp.8 |  | | | |  | |  | |  | 2 | |  | | 3 | | | 2 | | | | |  | 7 | | |
| *Pheidole* sp.9 | 3 | | | | 59 | |  | | 3 | 5 | |  | |  | | | 19 | | | | |  | 89 | | |
| *Pheidole* sp.11 | 4 | | | | 1 | |  | | 6 | 1 | |  | | 4 | | | 4 | | | | |  | 20 | | |
| *Pheidole* sp.12 |  | | | | 1 | |  | | 1 |  | |  | |  | | |  | | | | |  | 2 | | |
| *Pheidole* sp.13 |  | | | |  | |  | |  | 1 | |  | |  | | | 5 | | | | |  | 6 | | |
| *Pheidole* sp.14 |  | | | | 2 | |  | |  | 11 | |  | |  | | | 12 | | | | |  | 25 | | |
| *Pheidole* sp.15 | 1 | | | |  | |  | | 2 | 21 | |  | | 2 | | | 14 | | | | |  | 40 | | |
| *Pheidole* sp.16 | 3 | | | | 27 | |  | | 1 | 29 | |  | | 8 | | | 54 | | | | |  | 122 | | |
| *Pheidole* sp.17 | 1 | | | | 7 | |  | | 3 | 3 | |  | | 1 | | | 14 | | | | |  | 29 | | |
| *Pheidole* sp.18 |  | | | | 1 | |  | |  |  | |  | |  | | | 2 | | | | |  | 3 | | |
| *Pheidole* sp.19 | 1 | | | |  | |  | |  |  | |  | | 5 | | | 5 | | | | |  | 11 | | |
| *Pheidole* sp.21 |  | | | | 1 | |  | |  |  | |  | | 1 | | | 1 | | | | |  | 3 | | |
| *Pheidole* sp.22 |  | | | |  | |  | |  |  | |  | |  | | | 3 | | | | |  | 3 | | |
| *Rogeria* sp.1 |  | | | |  | |  | |  |  | |  | |  | | | 1 | | | | |  | 1 | | |
| *Solenopsis* sp.1 | 1 | | | | 2 | |  | |  | 5 | |  | | 4 | | | 1 | | | | |  | 13 | | |
| *Solenopsis* sp.2 |  | | | | 1 | |  | |  | 1 | |  | |  | | | 3 | | | | |  | 5 | | |
| *Solenopsis* sp.3 |  | | | | 31 | |  | | 2 | 22 | |  | | 5 | | | 21 | | | | |  | 81 | | |
| *Solenopsis* sp.4 |  | | | |  | |  | |  | 1 | |  | |  | | | 1 | | | | |  | 2 | | |
| *Solenopsis* sp.5 |  | | | | 4 | |  | |  | 7 | |  | | 7 | | | 33 | | | | |  | 51 | | |
| *Solenopsis* sp.6 |  | | | |  | |  | |  |  | |  | |  | | | 1 | | | | |  | 1 | | |
| *Solenopsis* sp.7 |  | | | |  | |  | |  | 1 | |  | |  | | |  | | | | |  | 1 | | |
| *Sericomyrmex* sp.1 |  | | | | 8 | |  | |  | 24 | |  | | 3 | | | 55 | | | | |  | 90 | | |
| *Sericomyrmex* sp.2 |  | | | |  | |  | |  |  | |  | |  | | | 1 | | | | |  | 1 | | |
| *Strumigenys* sp.1 | 1 | | | | 3 | |  | |  | 2 | |  | | 1 | | | 1 | | | | |  | 8 | | |
| *Strumigenys* sp.2 |  | | | |  | |  | |  | 1 | |  | |  | | |  | | | | |  | 1 | | |
| *Strumigenys* sp.3 |  | | | |  | |  | |  |  | |  | |  | | | 1 | | | | |  | 1 | | |
| *Tetramorium* aff *bicarinatum* (Nylander, 1846) |  | | | |  | |  | |  |  | |  | | 3 | | |  | | | | |  | 3 | | |
| *Tetramorium* sp.1 |  | | | |  | |  | |  |  | |  | |  | | | 1 | | | | |  | 1 | | |
| *Tetramorium* sp.2 |  | | | |  | |  | |  |  | |  | |  | | | 1 | | | | |  | 1 | | |
| *Wasmannia auropunctata* (Roger, 1863) |  | | | |  | |  | |  |  | |  | |  | | | 2 | | | | |  | 2 | | |
| **Subfamily Ponerinae** |  | | | |  | |  | |  |  | |  | |  | | |  | | | | |  |  | | |
| *Anochetus* sp.1 |  | | | | 1 | |  | |  | 2 | |  | | 1 | | | 4 | | | | |  | 8 | | |
| *Anochetus* sp.2 |  | | | | 1 | |  | | 1 | 1 | |  | |  | | | 2 | | | | |  | 5 | | |
| *Hypoponera* sp.1 | 1 | | | |  | |  | | 1 |  | |  | | 8 | | | 2 | | | | |  | 12 | | |
| *Hypoponera* sp.2 |  | | | |  | |  | |  | 1 | |  | |  | | | 2 | | | | |  | 3 | | |
| *Hypoponera* sp.3 |  | | | |  | |  | |  |  | |  | |  | | | 1 | | | | |  | 1 | | |
| *Hypoponera* sp.4 |  | | | | 1 | |  | |  | 1 | |  | |  | | | 4 | | | | |  | 6 | | |
| *Leptogenys* sp.1 |  | | | |  | |  | |  | 1 | |  | |  | | | 1 | | | | |  | 2 | | |
| *Mayaponera constricta* (Mayr, 1884) |  | | | |  | |  | |  |  | |  | | 1 | | |  | | | | |  | 1 | | |
| *Mayaponera* sp.1 |  | | | |  | |  | |  |  | |  | |  | | | 2 | | | | |  | 2 | | |
| *Neoponera apicalis* (Emery, 1901) |  | | | |  | |  | |  | 3 | |  | | 1 | | | 48 | | | | |  | 52 | | |
| *Neoponera commutata* (Roger, 1860) |  | | | | 1 | |  | |  | 4 | |  | | 2 | | | 14 | | | | |  | 21 | | |
| *Neoponera inversa* (Smith, F., 1858) |  | | | |  | |  | |  | 1 | |  | |  | | | 2 | | | | |  | 3 | | |
| *Neoponera verenae* (Forel, 1922) |  | | | |  | |  | |  |  | |  | |  | | | 27 | | | | |  | 27 | | |
| *Odontomachus* sp.1 |  | | | |  | |  | |  | 1 | |  | |  | | | 3 | | | | |  | 4 | | |
| *Odontomachus* sp.2 |  | | | |  | |  | |  | 1 | |  | |  | | | 4 | | | | |  | 5 | | |
| *Odontomachus* sp.3 |  | | | | 1 | |  | |  | 18 | |  | | 1 | | | 18 | | | | |  | 38 | | |
| *Odontomachus* sp.4 |  | | | | 1 | |  | |  |  | |  | |  | | | 5 | | | | |  | 6 | | |
| *Odontomachus* sp.5 |  | | | |  | |  | |  |  | |  | |  | | | 2 | | | | |  | 2 | | |
| *Pachycondyla crassinoda* (Latreille, 1802) |  | | | | 3 | |  | | 2 | 19 | |  | |  | | | 64 | | | | |  | 88 | | |
| *Pachycondyla harpax* (Latreille, 1802) |  | | | | 4 | |  | |  | 1 | |  | | 3 | | | 22 | | | | |  | 30 | | |
| **Subfamily Pseudomyrmicinae** |  | | | |  | |  | |  |  | |  | |  | | |  | | | | |  |  | | |
| *Pseudomyrmex gracilis* (Fabricius, 1804) |  | | | 2 | |  | |  | | 2 |  | |  | | | | | 2 |  | | | | 6 |
| *Pseudomyrmex tenuis* (Fabricius, 1804) |  | | | 3 | |  | |  | | 3 |  | |  | | | | | 15 |  | | | | 21 |
| *Pseudomyrmex termitarius* (Smith, F., 1855) |  | | | 31 | |  | |  | | 12 |  | |  | | | | | 3 |  | | | | 46 |
| *Pseudomyrmex* aff *peruvianus* (Fabricius, 1804) |  | | | | |  | |  | |  |  | |  | | | | | 1 |  | | | | 1 | |
| *Pseudomyrmex* sp.1 |  | | | 2 | |  | |  | | 3 |  | |  | | | | | 6 |  | | | | 11 |
| *Pseudomyrmex* sp.6 |  | | | 1 | |  | |  | |  |  | |  | | | | |  |  | | | | 1 |
| *Pseudomyrmex tenuis* sp.1 |  | | | 2 | |  | |  | | 1 |  | |  | | | | | 2 |  | | | | 5 |
| *Pseudomyrmex tenuis* sp.2 |  | | | 1 | |  | |  | | 2 |  | |  | | | | |  |  | | | | 3 |
| **Total number of species** | 21 | | | 88 | |  | | 28 | | 100 |  | | 57 | | | | | 151 |  | | | | 176 |
| **Total abundance** | 88 | | | 734 | |  | | 82 | | 662 |  | | 301 | | | | | 1670 |  | | | | 3537 |
